# Supplementary material for: Removal of trichloroethene by glucose oxidase immobilized on magnetite nanoparticles
Source: Royal Society of Chemistry journal article supplement (doi:10.1039/d3ra01168b), 2023-01-01
Supplement: d3ra01168b1.pdf [file d3ra01168b1.pdf]

1 Supplementary Information for

2 **Removal of Trichloroethene by Glucose Oxidase Immobilized on Magnetite**

3 **Nanoparticles**

4 *Mengyang Wang<sup>1</sup>, Yao Huang<sup>1\*</sup>, Hui Liu<sup>1,2</sup>*

5 1, Hubei Key Laboratory of Yangtze Catchment Environmental Aquatic Science,

6 School of Environmental Studies, China University of Geosciences, Wuhan 430078,

7 China

8 2, State Key Laboratory of Biogeology and Environmental Geology, China

9 University of Geosciences, Wuhan 430078, China

10

11

12

13

14

15

16

17

18

19 \* Corresponding author at: Tel: +86-15972160186 (Y. Huang).

20 **E-mail address:** huangyao@cug.edu.cn (Y. Huang).

## 21 **Preparation of Magnetite nanoparticles and MIG**

22 Preparation of magnetite nanoparticles: 8.68 mmol of ferric ammonium sulfate  
23 and 4.34 mmol of ferrous ammonium sulfate were dissolved in a 250 ml three-necked  
24 flask containing 100 ml of ultrapure anaerobic water and then mechanically stirred at  
25 800 rpm in a water bath at 85°C for 20 minutes under the protection of N<sub>2</sub>. Then 25%  
26 (v/v) ammonia solution was added dropwise and continued dropwise when the color of  
27 the solution changed from orange-red to black until the pH of the mixture reached 10.  
28 The mixture was transferred to an anaerobic flask and the magnetite particles were  
29 separated with neodymium magnets and rinsed several times using deionized water to  
30 remove excess ammonia and salt to pH neutral. The magnetite was dried by freeze dryer  
31 and stored in a vacuum bag.

32 Preparation of MIG: First, the magnetite particles (1g) were dispersed in 1 wt%  
33 chitosan solution (in 0.05M acetic acid) with a solid-liquid ratio of 10g/L. Then stable  
34 chitosan-stabilized magnetic nanoparticles (Fe<sub>3</sub>O<sub>4</sub>-CS) were obtained by dispersing  
35 ultrasonic treatment (40 kHz) for 25 min at room temperature, followed by rinsing with  
36 deionized water to pH-neutral, and lyophilization after separation by a magnet. 200 mg  
37 Fe<sub>3</sub>O<sub>4</sub>-CS was added in 30 ml anaerobic water and sonicated at 25°C for 5 min, then  
38 0.4 ml 25% glutaraldehyde (0.2%) was added drop by drop and vortexed for 2 min,  
39 then 20 ml solution containing 20 mg of enzyme was added and vortexed for 2 min;  
40 finally shaken in a shaker at 150 rpm for 3 h at 30°C (designed enzyme/magnetite  
41 content of 10U/mg). The solid was separated with a neodymium magnet and rinsed  
42 three times with 50 mL of deionized water to obtain magnetite particles loaded with  
43 glucose oxidase (MIG).

44

45

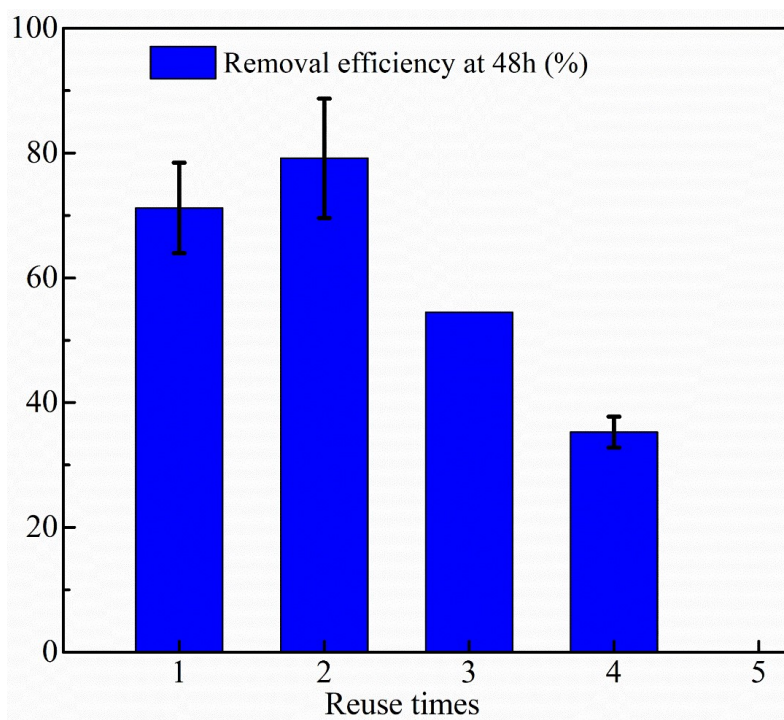

46

47 Fig. S1 Effect of recycling numbers of MIG on TCE removal efficiency. Experimental conditions:

48 200 mg MIG, 10 mg/L TCE, , 2.5 mM glucose, 25°C, 150 rpm, 48 h.

49

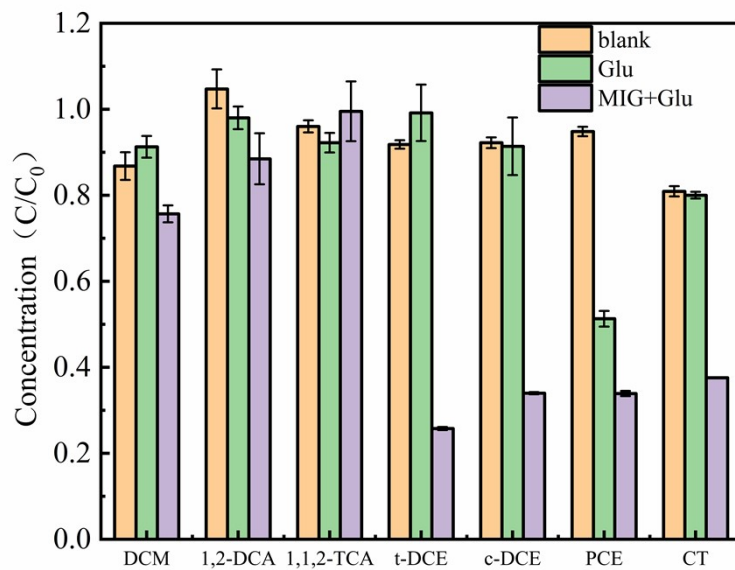

50

51 Fig. S2 Removal efficiencies of different chlorinated pollutants by MIG-glucose system.

52 Experimental conditions: 200 mg MIG, 10 mg/L chlorinated pollutant, 2.5 mM glucose, 25°C, 150

53 rpm, 48 h.

54

55 Table S1 Kinetic fitting results of TCE degradation.

| Conditions      |              |               |                |              |               |                | Pseudo-first order fitting     |                                 |                |
|-----------------|--------------|---------------|----------------|--------------|---------------|----------------|--------------------------------|---------------------------------|----------------|
| [TCE]<br>(mg/L) | Temp<br>(°C) | pH<br>Initial | pH<br>Buffered | DO<br>(mg/L) | Salt<br>(2mM) | [HA]<br>(mg/L) | $C_t=C_0*e^{-kt}$              |                                 |                |
|                 |              |               |                |              |               |                | $k*10^3$<br>(h <sup>-1</sup> ) | $t_{1/2}$<br>(h <sup>-1</sup> ) | R <sup>2</sup> |
| 5               |              |               |                |              |               |                | 26.26±7.36                     | 26.40                           | 0.7925         |
| 10              | 25           | 6.1           | N/A            | 6.01         | N/A           | N/A            | 62.62±16.31                    | 11.07                           | 0.5868         |
| 20              |              |               |                |              |               |                | 52.29±4.94                     | 13.26                           | 0.9598         |
| 50              |              |               |                |              |               |                | 60.44±8.38                     | 11.47                           | 0.9090         |
|                 |              |               |                |              |               |                | 50.34±8.56                     | 13.77                           | 0.8262         |
|                 |              |               |                |              |               |                | 71.54±6.06                     | 9.69                            | 0.9731         |
|                 |              |               |                |              |               |                | 82.4±12.29                     | 8.41                            | 0.9097         |
|                 |              |               |                |              |               |                | 58.42±4.75                     | 11.86                           | 0.9736         |
|                 |              |               |                |              |               |                | 35.62±7.09                     | 19.46                           | 0.8699         |
|                 |              |               |                |              |               |                | 90.41±20.16                    | 7.67                            | 0.7788         |
|                 |              |               |                |              |               |                | 51.88±11.08                    | 13.36                           | 0.7052         |
|                 | 71.75±9.83   | 9.66          | 0.9209         |              |               |                |                                |                                 |                |
|                 | 79.01±9.82   | 8.77          | 0.9459         |              |               |                |                                |                                 |                |
|                 |              |               |                | 0            |               |                | 20.97±5.55                     | 33.05                           | 0.2711         |
|                 |              |               |                | 3.45         |               |                | 27.62±8.55                     | 25.10                           | 0.1399         |
| 10              | 25           | 6.1           | N/A            | 6.01         | N/A           | N/A            | 21.52±2.23                     | 32.21                           | 0.9189         |
|                 |              |               |                |              |               |                | 25.51±5.62                     | 27.17                           | 0.5420         |
|                 |              |               |                |              |               |                | 26.72±4.48                     | 25.94                           | 0.7615         |
|                 |              |               |                |              |               |                | 24.75±6.56                     | 28.01                           | 0.3085         |
|                 |              |               |                |              |               |                | 23.28±6.01                     | 29.77                           | 0.3226         |
|                 |              |               |                |              |               |                | 23.12±5.14                     | 29.98                           | 0.5130         |
|                 |              |               |                |              |               |                | 26.92±6.04                     | 25.75                           | 0.5345         |
|                 |              |               |                |              |               |                | 22.19±5.49                     | 31.24                           | 0.7896         |
|                 |              |               |                |              |               |                | 30.2±6.41                      | 22.95                           | 0.8470         |
|                 |              |               |                |              |               |                | 18.05±3.28                     | 38.40                           | 0.8448         |
|                 | 17.39±1.12   | 39.86         | 0.9750         |              |               |                |                                |                                 |                |
